# Supplementary material for: Electrically controlled spin reversal and spin polarization of electronic transport in nanoporous graphene nanoribbons
Source: Royal Society of Chemistry journal article supplement (doi:10.1039/d1cp02547c), 2021-01-01
Supplement: d1cp02547c1.pdf [file d1cp02547c1.pdf]

### Supplementary Information

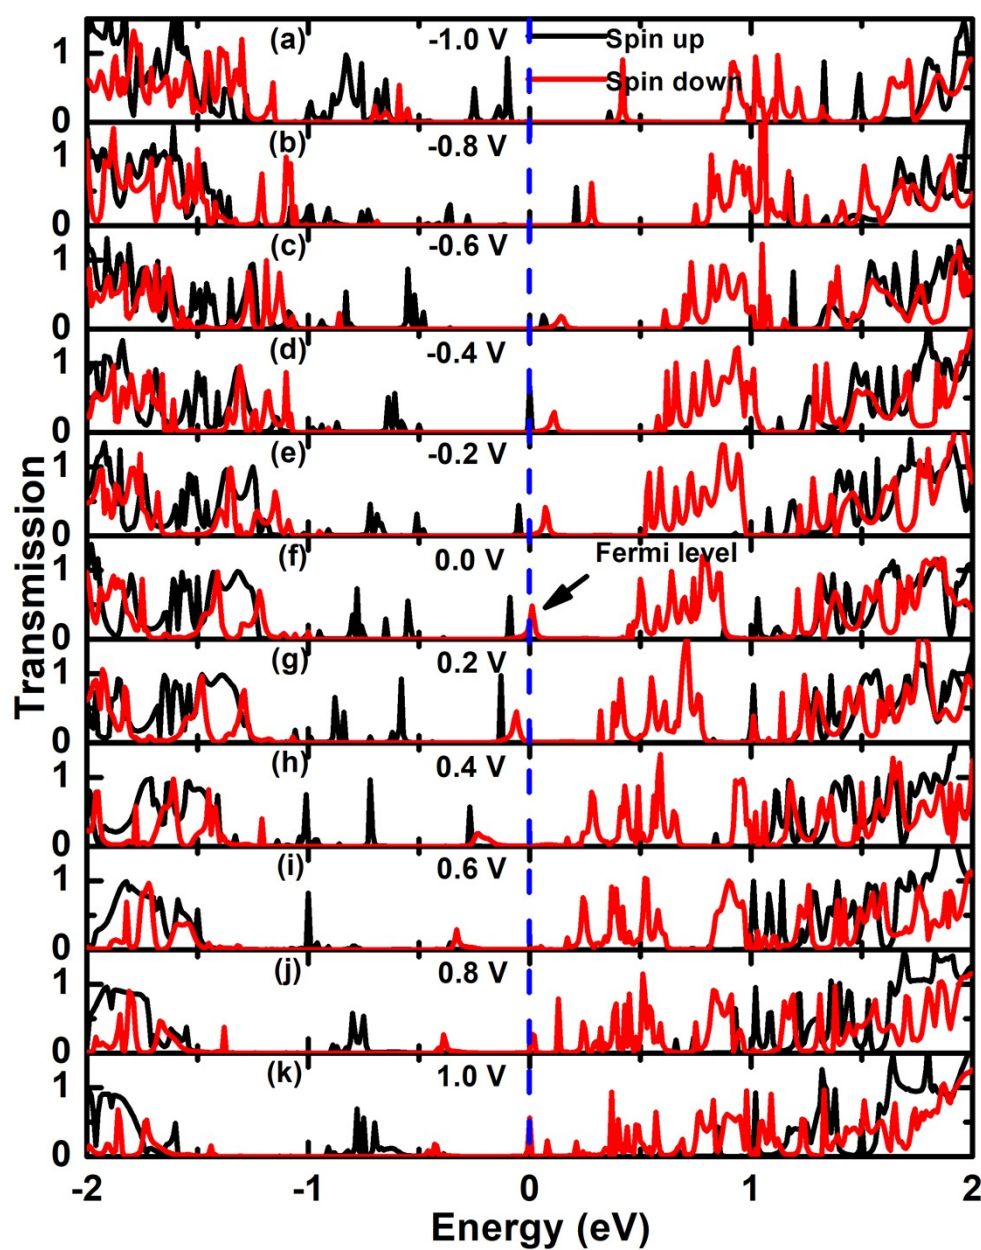

**Fig. S1** (Color online) (a)-(k) Transmission spectra of ZGNR-ZGMRP22-ZGMR systems varying with gate voltage, which are denoted in the insets.

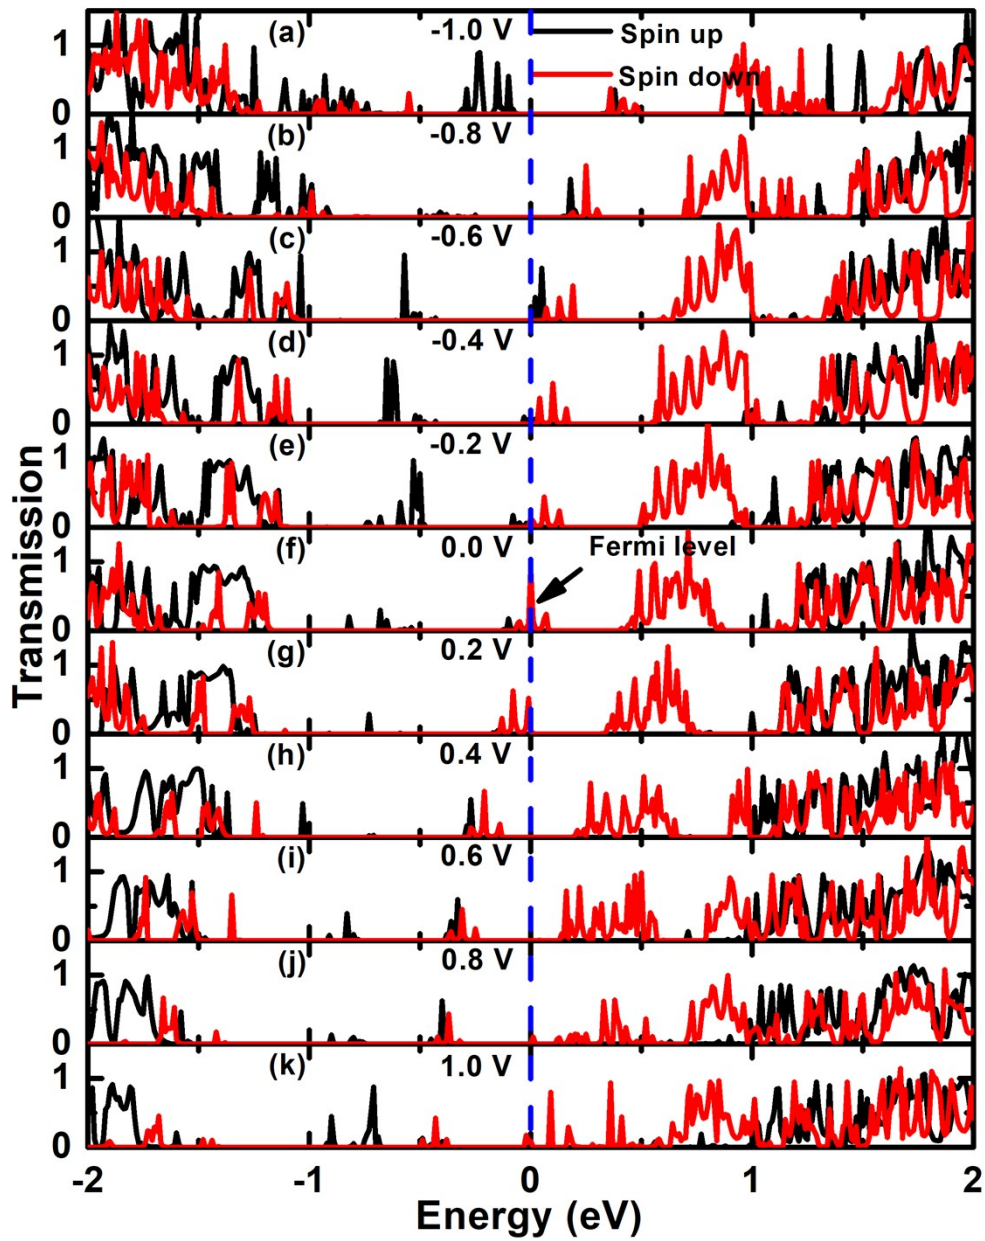

**Fig. S2** (Color online) (a)-(k) Transmission spectra of ZGNR-ZGNRP24-ZGNR systems varying with gate voltage, which are denoted in the insets.

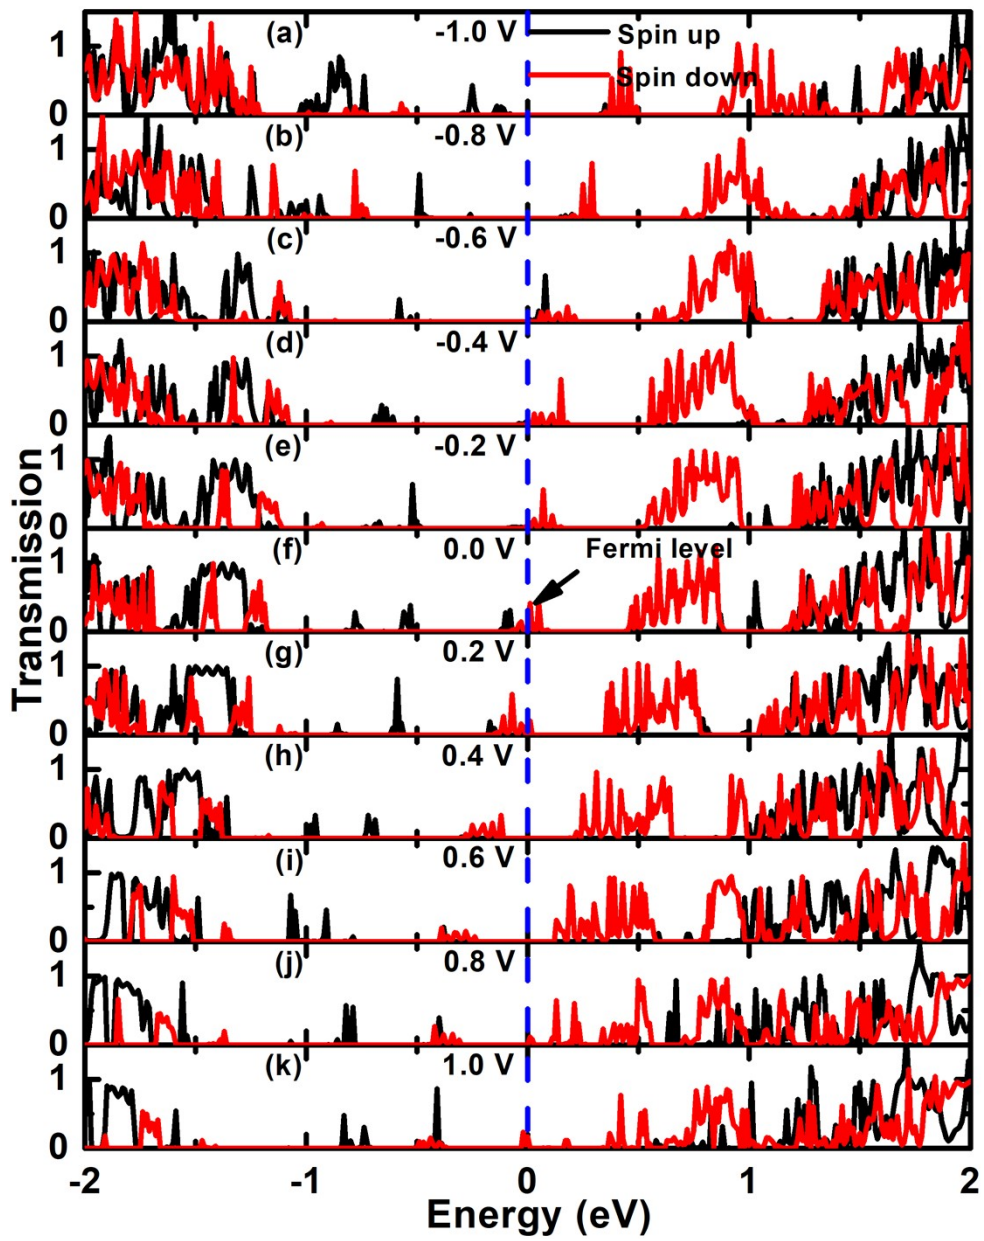

**Fig. S3** (Color online) (a)-(k) Transmission spectra of ZGNR-ZGNRP26-ZGNR systems varying with gate voltage, which are denoted in the insets.

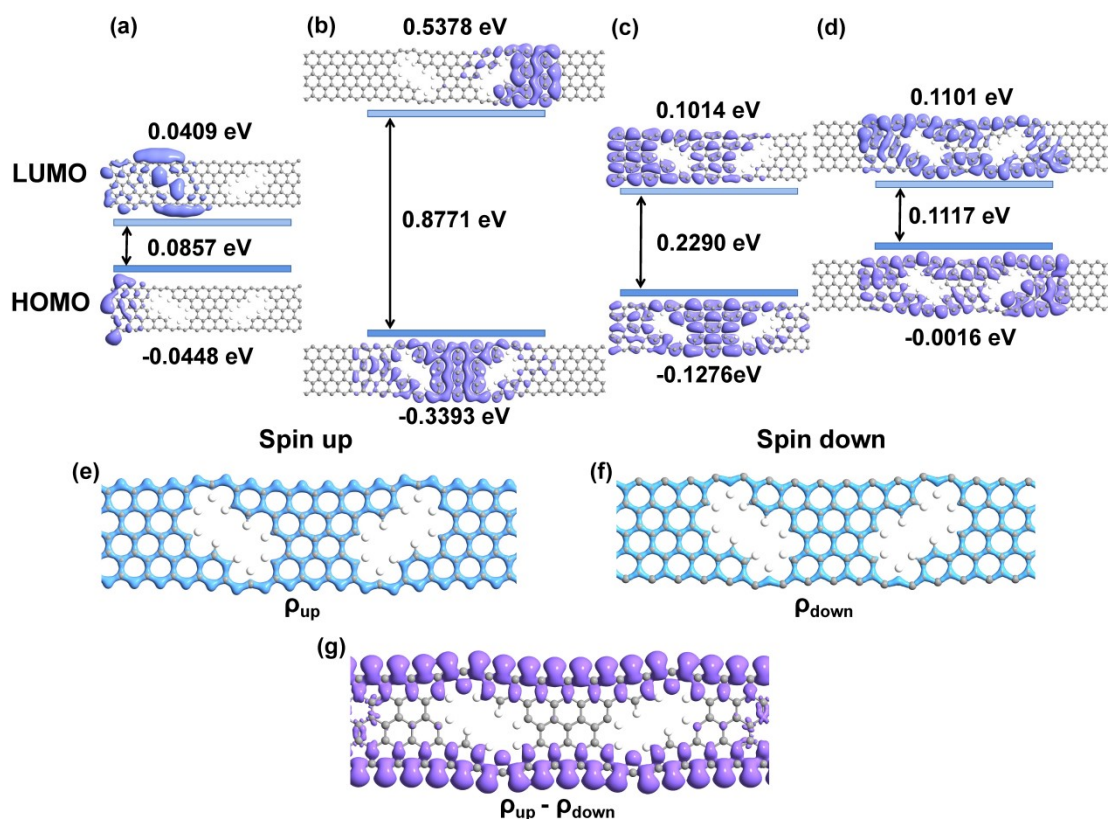

**Fig. S4** (Color online) (a) The Highest Occupied Molecular Orbital / Lowest Unoccupied Molecular Orbital (HOMO/LUMO) states of isolated ZGNRP12 molecule for spin-up component. (b) The HOMO/LUMO states of the molecular projected self-consistent Hamiltonian (MPSH) of the two-probe system onto the central scattering region for spin-up component. (c)-(d) The same cases for spin-down component. (e)-(g) The spin-up and spin-down electron densities, as well as their difference (spin charge density magnetization) for ZGNR-ZGNRP12-ZGNR, respectively. The isovalues are 0.8, 0.8 and  $0.02 \text{ \AA}^{-3/2}$  respectively.

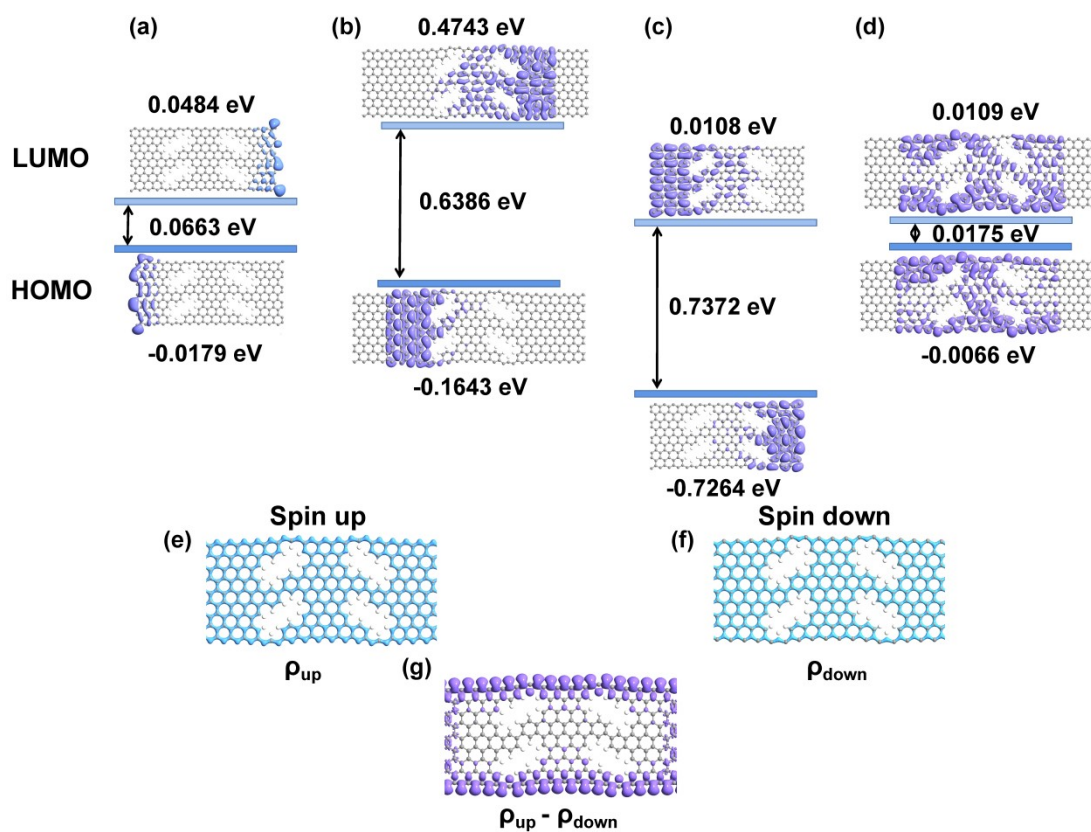

**Fig. S5** (Color online) (a) The HOMO/LUMO states of isolated ZGMRP22 molecule for spin-up component. (b) The HOMO/LUMO states of the MPSH of the two-probe system onto the central scattering region for spin-up component. (c)-(d) The same cases for spin-down component. (e)-(g) The spin-up and spin-down electron densities, as well as their difference (spin charge density magnetization) for ZGNR-ZGMRP22-ZGNR, respectively. The isovalues are 0.8, 0.8 and 0.02  $\text{\AA}^{-3/2}$  respectively.

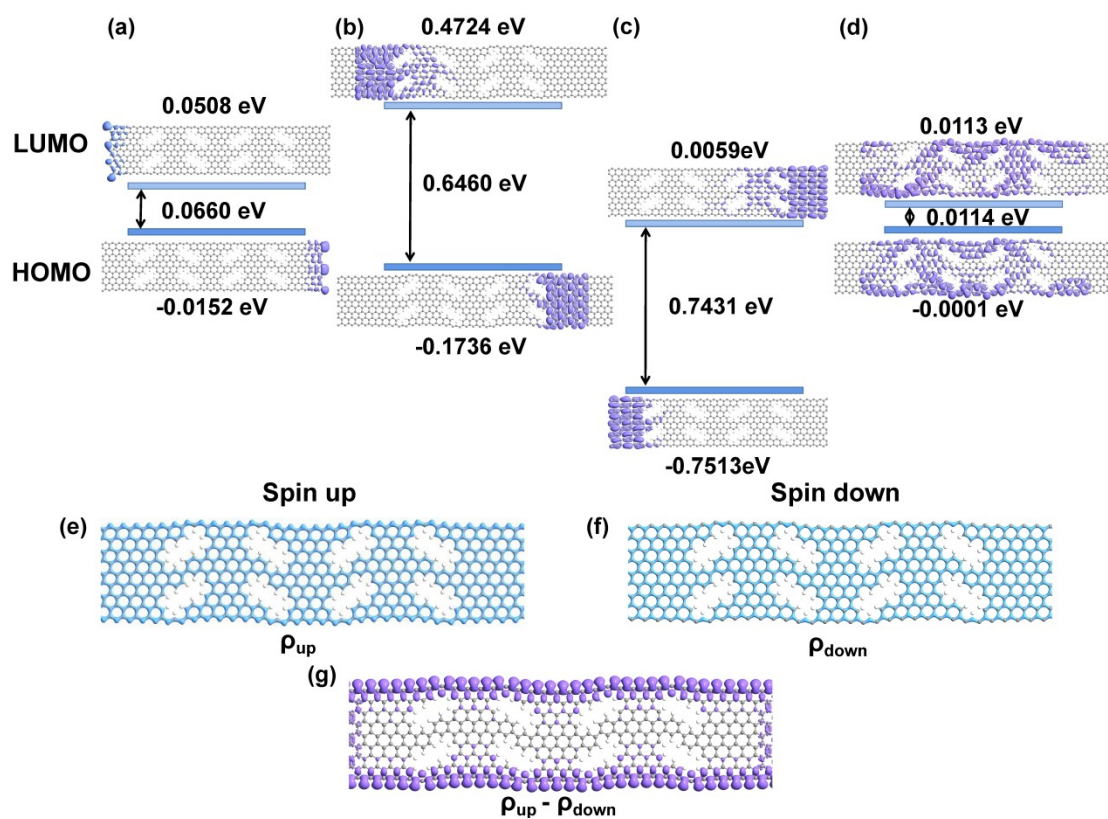

**Fig. S6** (Color online) (a) The HOMO/LUMO states of isolated ZGMRP24 molecule for spin-up component. (b) The HOMO/LUMO states of the MPSH of the two-probe system onto the central scattering region for spin-up component. (c)-(d) The same cases for spin-down component. (e)-(g) The spin-up and spin-down electron densities, as well as their difference (spin charge density magnetization) for ZGNR-ZGMRP24-ZGNR, respectively. The isovalues are 0.8, 0.8 and 0.02  $\text{\AA}^{-3/2}$  respectively.

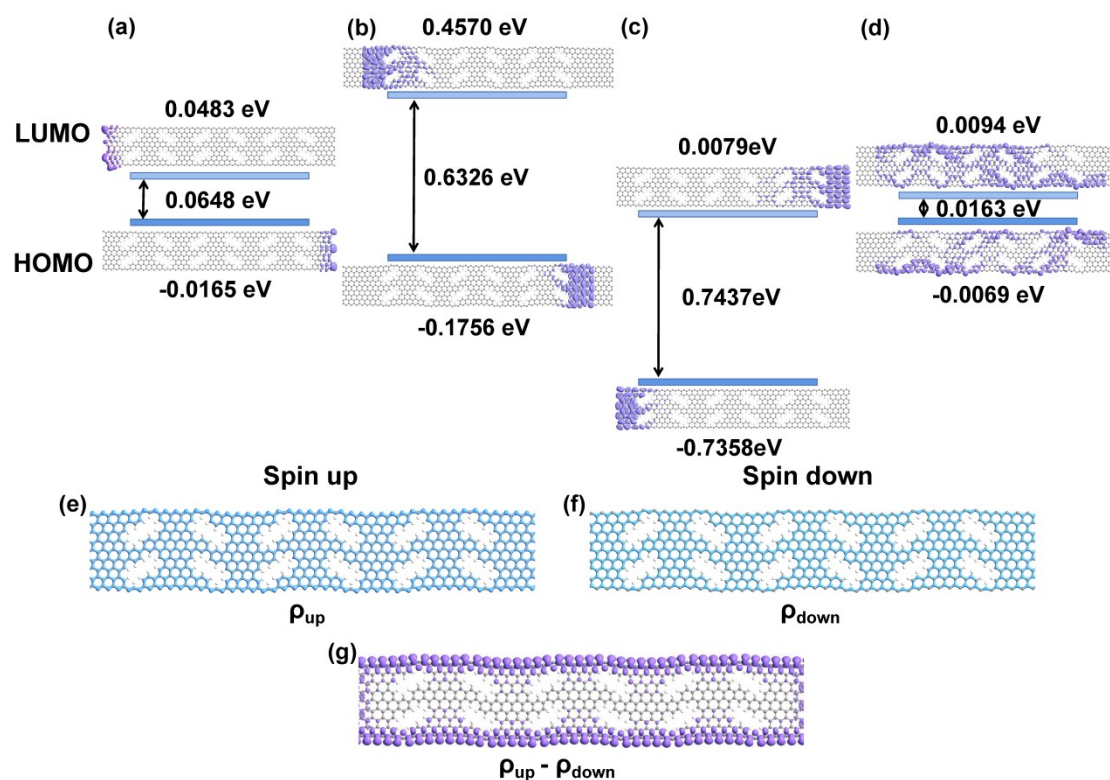

**Fig. S7** (Color online) (a) The HOMO/LUMO states of isolated ZGMRP26 molecule for spin-up component. (b) The HOMO/LUMO states of the MPSH of the two-probe system onto the central scattering region for spin-up component. (c)-(d) The same cases for spin-down component. (e)-(g) The spin-up and spin-down electron densities, as well as their difference (spin charge density magnetization) for ZGNR-ZGMRP26-ZGNR, respectively. The isovalues are 0.8, 0.8 and 0.02  $\text{\AA}^{-3/2}$  respectively.
